# Supplementary material for: A COX-2/sEH dual inhibitor PTUPB alleviates lipopolysaccharide-induced acute lung injury in mice by inhibiting NLRP3 inflammasome activation
Source: Theranostics. 2020 Mar 26;10(11):4749–61. doi: 10.7150/thno.43108 (PMC7163435; doi:10.7150/thno.43108)
Supplement: Supplementary file 1 — Supplementary materials and methods, figures, and tables. [file thnov10p4749s1.pdf]

1 **Materials and Methods**

2 Detection of the gene expressions of *Alox*s

3 The gene expression of *Alox5*, *Alox12*, and *Alox15* was detected by RT-qPCR. The sequences of primers  
4 are shown in Table S1.

5  
6 **Macrophages depletion *in vivo***

7 Macrophages were depleted as previous studies [1, 2]. ALI mice randomly received a single dose of  
8 liposomal clodronate or liposomal PBS without clodronate (from F70101C-AC-2, FormuMax, USA) *via* the  
9 tail vein (150  $\mu$ L) and tracheal instillation (50  $\mu$ L) 24 h before the induction of ALI. Clodronate liposomes  
10 encapsulated dichloromethylene diphosphonate. The concentration of the liposomal clodronate suspension  
11 was 7 mg/mL, which led to macrophage depletion.

12  
13 **Immunofluorescence staining**

14 For the lung tissues, the paraffin-embedded sections (3- $\mu$ m) of the lung tissue were baked at 65 °C for 2  
15 h. After deparaffinization, antigen retrieval, and serum blocking, the sections were incubated with primary  
16 antibodies against F4/80 or MPO at 4 °C overnight. For primary murine peritoneal macrophages, after  
17 treatment, cells were washed and fixed with 4% paraformaldehyde for 15 min, permeabilized with 0.1%  
18 TritonX100 for 15 min, and blocked with 1% BAS for 30 min, then incubated with primary antibodies against  
19 NF- $\kappa$ B/p65 at 4 °C overnight. Then the sections or cells were incubated with the relevant secondary antibody  
20 for 1 h at room temperature. The nuclei were stained with fluorescent dye 4',6-diamidino-2-phenylindole  
21 (DAPI) for 5 min. All the images were captured on a Nikon ECLIPSE Ti microscope (Nikon, Tokyo, Japan),  
22 and the sections and cells were examined at 400 $\times$  magnification. The antibodies used in the study are shown  
23 in Table S2.

24  
25

26 **Supplementary Tables**

27 Table S1. Sequences of the primers used to quantitate gene expression.

| Gene          | Forward primer (5'–3') | Reverse primer (5'–3') |
|---------------|------------------------|------------------------|
| <i>Alox5</i>  | GTTCCCATGTTACCGCTGGA   | TACGTCTGTGCTGCTTGAGG   |
| <i>Alox12</i> | TTCTCCGGATCCCTCAACCT   | CGGGAACGTCGAAGTCAAAC   |
| <i>Alox15</i> | GTAACCCACCACG TTCAGCA  | AAAGCGGAAGCGATCAAGGA   |

28

29

Table S2. The antibodies used Immunofluorescence staining

| Antibodies                                                      | Source     | Catalog | Dilution ratio |
|-----------------------------------------------------------------|------------|---------|----------------|
| F4/80 polyclonal antibody                                       | Servicebio | GB11027 | 1:500          |
| MPO polyclonal antibody                                         | Servicebio | GB11224 | 1:500          |
| NF-κBp65 polyclonal antibody                                    | Servicebio | GB11142 | 1:200          |
| DyLight 488 Conjugated AffiniPure Goat<br>Anti-rabbit IgG (H+L) | Boster     | BA1127  | 1:400          |
| DyLight 550 Conjugated AffiniPure Goat<br>Anti-rabbit IgG (H+L) | Boster     | BA1135  | 1:400          |

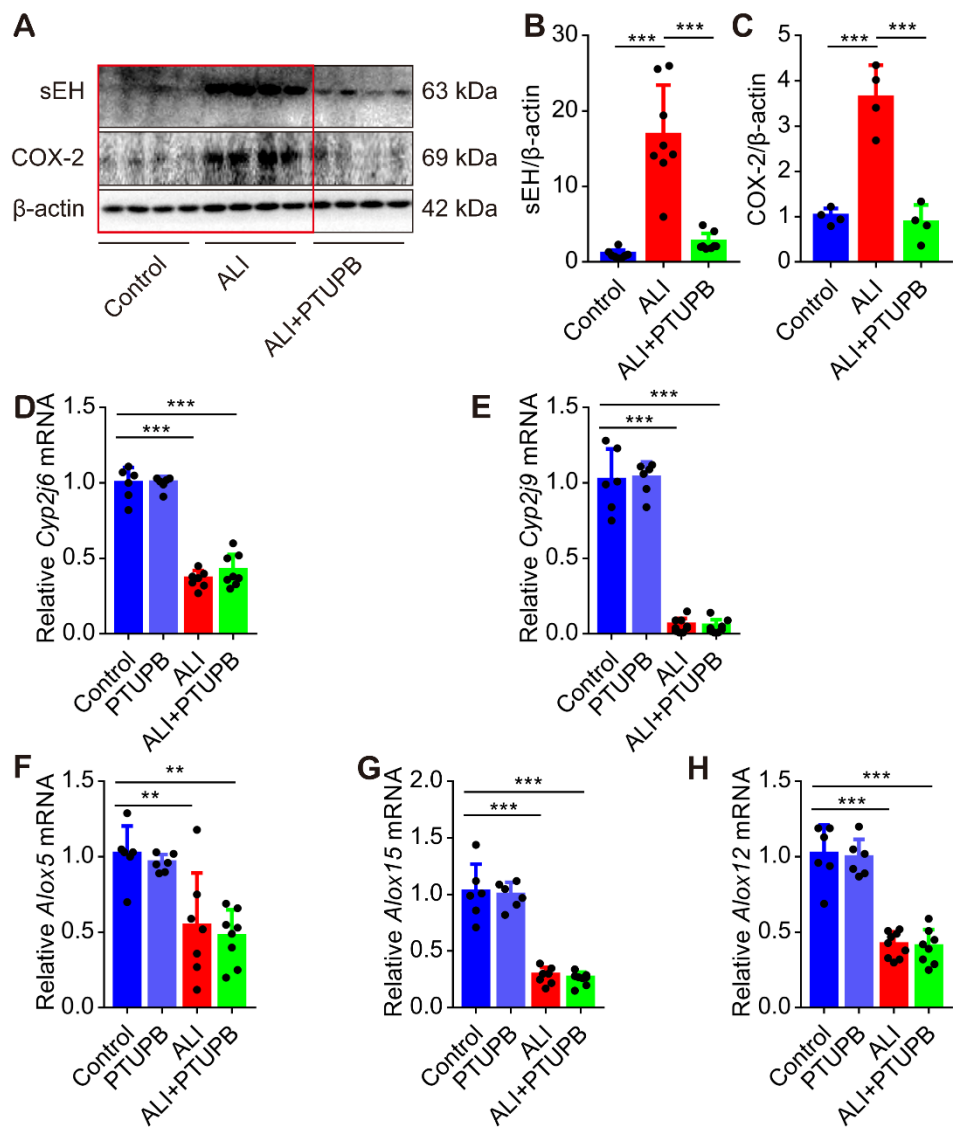

33

34     **Figure S1.** PTUPB restores the expression of sEH and COX-2 rather than *Cyps* and *Alox*s in the lung of LPS-  
35     treated mice with and without PTUPB treatment. C57BL/6 mice were intraperitoneally injected with PTUPB  
36     1 h before the LPS administration. Twelve hours after the LPS administration. Expression of sEH and COX-  
37     2 protein in lung tissue was detected by Western blotting (A-C,  $n = 4-8$ ). Picture in the red frame is also shown  
38     in Fig. 1. mRNA expression of *Cyp2j6*, *Cyp2j9*, *Alox5*, *Alox12*, and *Alox15* in the lungs was detected by RT-  
39     qPCR (D-H,  $n = 6-8$ ). Data are expressed as the mean  $\pm$  SD. \*\*  $P < 0.01$  and \*\*\*  $P < 0.001$ .

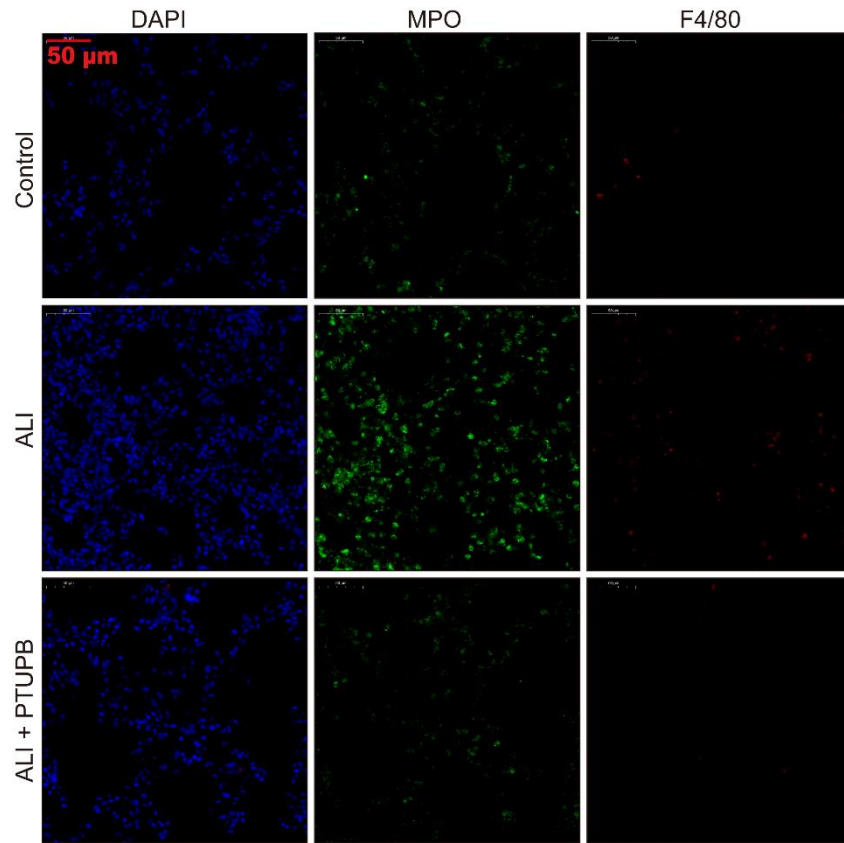

**Figure S2.** PTUPB reduces the infiltration of the neutrophils and macrophages in LPS-induced lung injury mice. C57BL/6 mice received LPS injection (5 mg/kg, *i.t.*) with or without PTUPB pre-treatment (5 mg/kg) for 1 h. Twelve hours after the LPS injection, immunofluorescent assay was used to detect the expression of MPO (Green) and F4/80 (Red) as the marker of neutrophils and macrophages, respectively.

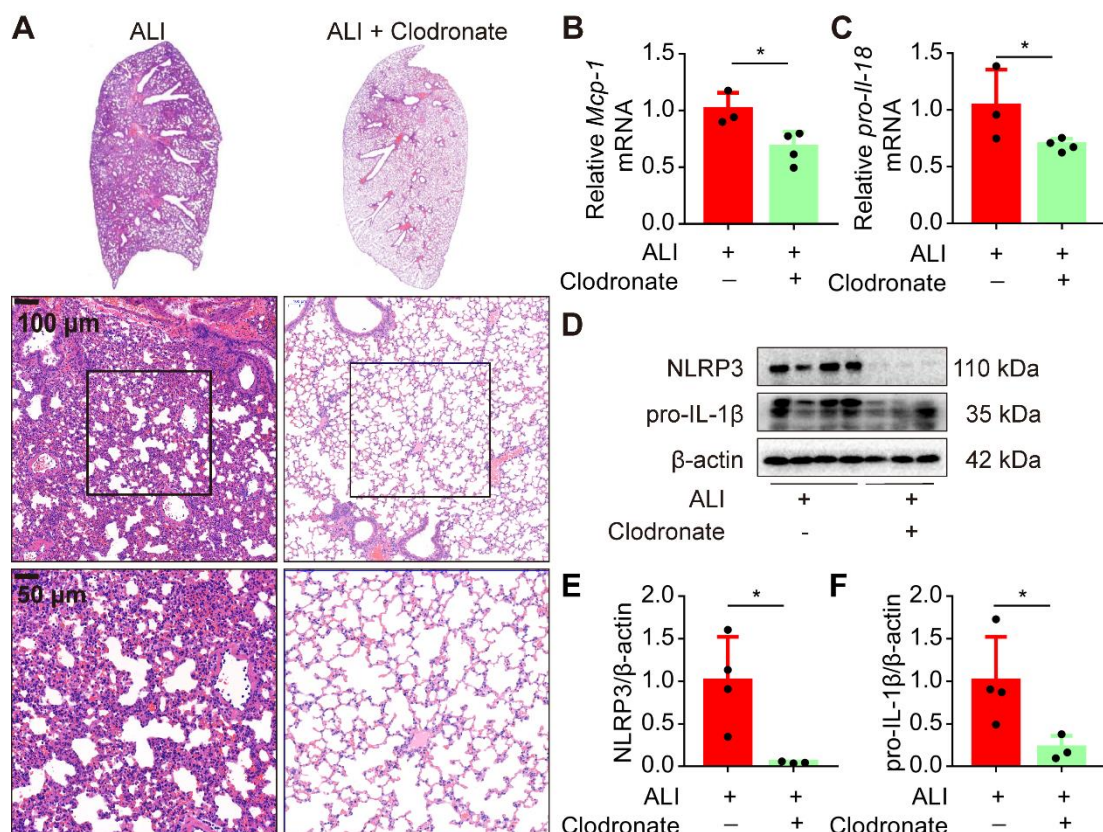

**Figure S3.** Macrophages depletion ameliorates the lung tissue injury of ALI mice. Liposomal clodronate or liposomal PBS (150  $\mu$ L, *i.v.* and 50  $\mu$ L, *i.t.*) was administered to mice 24 h before the induction of ALI by LPS (5 mg/kg, *i.t.*). Lung histopathology was performed with H&E staining (A). mRNA expression of *Mcp-1* (B,  $n = 3-4$ ) and *pro-Il-18* (C,  $n = 3-4$ ) in the lungs was detected by RT-qPCR. Protein expression of NLRP3 and pro-IL-1 $\beta$  in lung tissue was detected by Western blotting (D-F,  $n = 3-4$ ). Data are expressed as the mean  $\pm$  SD. \*  $P < 0.05$ .

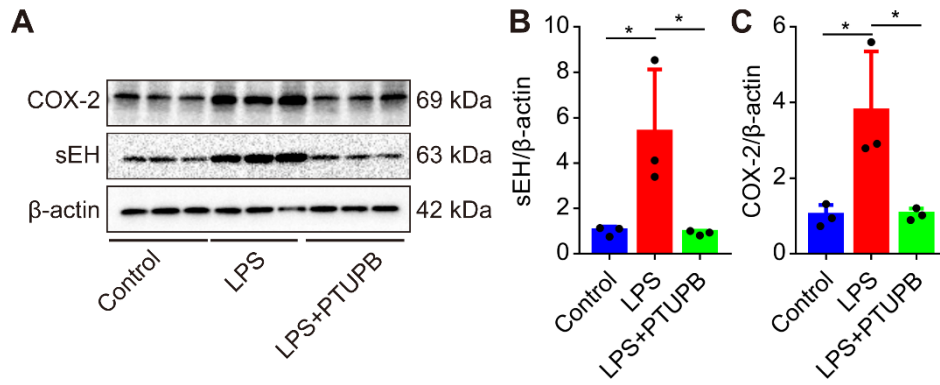

**Figure S4.** PTUPB restores the dysregulation of sEH/COX-2 in LPS-stimulated primary murine macrophages. Primary murine macrophages received LPS treatment (10 ng/mL) with or without PTUPB pre-treatment (1  $\mu$ M) for 1 h. Twelve hours after the LPS treatment, protein expression of COX-2 and sEH in primary murine macrophage was detected by Western blotting (A-C,  $n = 3$ ). Data are expressed as the mean  $\pm$  SD. \*  $P < 0.05$ .

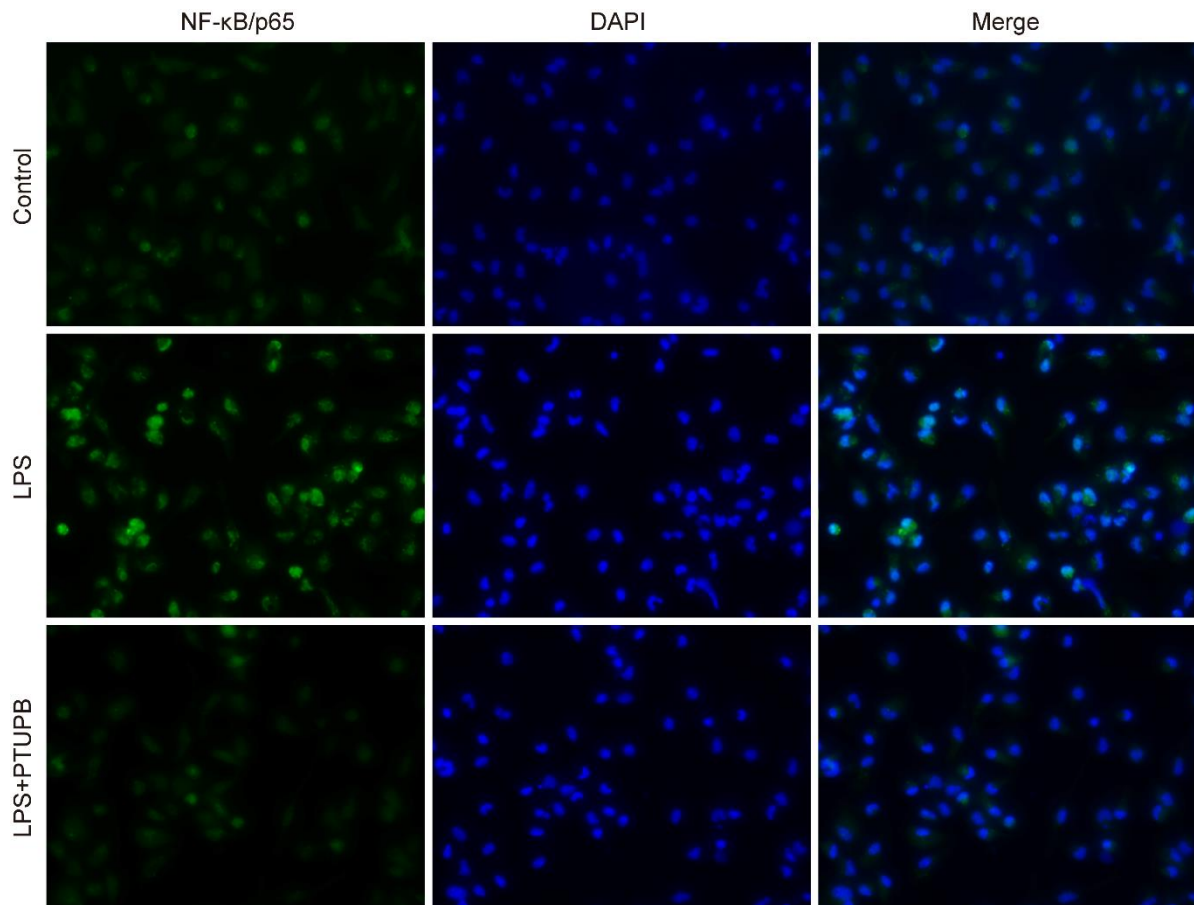

**Figure S5.** PTUPB inhibits the nuclear translocation of NF-κB/p65 in LPS-stimulated primary murine macrophages. Primary murine macrophages received LPS treatment (10 ng/mL) with or without PTUPB pre-treatment (1 μM) for 1 h. Twelve hours after the LPS treatment, immunofluorescent assay was used to detect the nuclear translocation of NF-κB/p65 (green) and DAPI (blue) as the marker of the nucleus.

#### References:

1. Moreno SG. Depleting Macrophages In Vivo with Clodronate-Liposomes. *Methods Mol Biol.* 2018; 1784: 259-62.
2. Frank JA, Wray CM, McAuley DF, Schwendener R, Matthay MA. Alveolar macrophages contribute to alveolar barrier dysfunction in ventilator-induced lung injury. *Am J Physiol Lung Cell Mol Physiol.* 2006; 291: L1191-8.
